# Supplementary material for: BioChemUDM: a unified data model for compounds and assays
Source: publisher site journal article supplement (doi:10.1515/pac-2021-1004), 2022-06-01
Supplement: Supplementary file 1 [file j_pac-2021-1004_suppl.docx]

# Appendix A: BioChemUDM Labels and Relationships

The following table lists string label abbreviations and their relationship with one another.

| String Label | Description | May be child of | May be parent of |
| --- | --- | --- | --- |
| ASY | Assay | UDM | Name (a unique ID), CND, DAT, MOL, RES, TST |
| BAT | Batch | MOL | Name (a unique ID), SAM |
| CITE | Citation | any | DigitalObjectIdentifier |
| CND | Condition | ASY | Format, Target, assay-specific conditions |
| COM | Company | UDM | Contact (person), Organization (IDYA), ASY, DOC, ELN, MOL, PRJ, RXN |
| DAT | Metadata | ASY | Control (a unique ID), Comment (free text) |
| DOC | Document | UDM | Query (a search string) |
| ELN | E-notebook | UDM | Query (a search string) |
| MOL | Molecule | ASY, RXN, UDM | Name (a unique ID) |
| PRJ | Project | UDM | Code (a unique ID) |
| RES | Result | ASY | Assay-specific readouts |
| RXN | Reaction | UDM | Name (a unique ID) |
| SAM | Sample | BAT | Name (a unique ID) |
| TST | Test | ASY | Article (reference to ID) |
| UDM | Unified Data Model | none | ASY, COM, DOC, ELN, MOL, PRJ, RXN |

# Appendix B: BioChemUDM SMIRKS Patterns for Tautomer Normalization

As mentioned, our SMIRKS patterns originate from recent work based on the CACTVS tools. For compatibility with RDKit, one pattern for ring pi electrons (PT_05_00) has been excluded. For compatibility with Pipeline Pilot, PT_05_00 has been excluded and attribute ranges have been expanded. For compatibility with our compound registry, all patterns have been reduced from explicit to implicit hydrogens. Our testing reveals these adapted SMIRKS determine a canonical tautomer from variably drawn drug-like molecules, albeit not comprehensive for every pattern in the set.

Pattern PT_05_00: Exclusion of ring pi electron count (for RDKit and Pipeline Pilot).

- Removed: [#1:4][N:1][C;e6:2]=[O,NX2:3]>>[NX2,nX2:1]=[C,c;e6:2][O,N:3][#1:4]

Example: Expansion of attribute ranges (for Pipeline Pilot).

- From: [#1,a,O:5][NX2:1]=[Cz{1-2}:2][CX4R{0-2}:3][#1:4]
- To: [#1,a,O:5][NX2:1]=[Cz1:2][CX4R0;H1:3]>>[#1,a,O:5][NX3;!H0:1][Cz:2]=[C:3]
  [#1,a,O:5][NX2:1]=[Cz1:2][CX4R1;H1:3]>>[#1,a,O:5][NX3;!H0:1][Cz:2]=[C:3]
  [#1,a,O:5][NX2:1]=[Cz1:2][CX4R2;H1:3]>>[#1,a,O:5][NX3;!H0:1][Cz:2]=[C:3]
  [#1,a,O:5][NX2:1]=[Cz2:2][CX4R0;H1:3]>>[#1,a,O:5][NX3;!H0:1][Cz:2]=[C:3]
  [#1,a,O:5][NX2:1]=[Cz2:2][CX4R1;H1:3]>>[#1,a,O:5][NX3;!H0:1][Cz:2]=[C:3]
  [#1,a,O:5][NX2:1]=[Cz2:2][CX4R2;H1:3]>>[#1,a,O:5][NX3;!H0:1][Cz:2]=[C:3]

Example: Reduction of patterns from explicit to implicit hydrogens (for our registry).

- From: [O,S,Se,Te;X1:1]=[Cz1H0:2][C:5]=[C:6][CX4z0,NX3:3][#1:4]
- To: [O,S,Se,Te;X1:1]=[Cz1H0:2][C:5]=[C:6][CX4z0,NX3;H1:3]

Patterns are implemented from top-to-bottom and left-to-right and terminate recursion using identity.

# Appendix C: BioChemUDM for Compounds, Batches, and Samples

An example SDfile of DL-alanine after registration with string labels for compound, batch, and sample is shown below. The XML code (PP script) for the component *Perceive Structure & Stereo* is provided as an example implementation as well.

IDEAYA Drawing Rules.sdf

ChemDraw09202115432D

0 0 0 0 0 0 V3000

M V30 BEGIN CTAB

M V30 COUNTS 6 5 1 0 0

M V30 BEGIN ATOM

M V30 1 C -0.357235 -0.206250 0.000000 0

M V30 2 C 0.357236 0.206250 0.000000 0

M V30 3 O 1.071707 -0.206250 0.000000 0

M V30 4 C -1.071707 0.206250 0.000000 0

M V30 5 O 0.357236 1.031250 0.000000 0

M V30 6 N -0.357235 -1.031250 0.000000 0

M V30 END ATOM

M V30 BEGIN BOND

M V30 1 1 1 2

M V30 2 1 2 3

M V30 3 1 1 4

M V30 4 2 2 5

M V30 5 1 1 6 CFG=1

M V30 END BOND

M V30 BEGIN COLLECTION

M V30 MDLV30/STERAC1 ATOMS=(1 1)

M V30 END COLLECTION

M V30 END CTAB

M END

> <UDM.MOL.Num>

7

> <UDM.MOL.Name>

IDYA-7

> <UDM.MOL.Synonyms>

PubChem/602

> <UDM.MOL.KeyVal>

FE0XF

> <UDM.MOL.BAT.Num>

3

> <UDM.MOL.BAT.Name>

IDYA-7-3

> <UDM.MOL.BAT.ExperimentID>

ELN-721237

> <UDM.MOL.BAT.Source>

Pharmaron

> <UDM.MOL.BAT.Tag>

Project X

> <UDM.MOL.BAT.Synonym>

SHE-Batch-1-1

> <UDM.MOL.BAT.ANA.FILE.FileName>

SHE-Batch-1-1.pdf

> <UDM.MOL.BAT.ANA.FILE.FileMethod>

LCMS

H1NMR

HPLC

SFC

> <UDM.MOL.BAT.Comment>

mixture

> <UDM.MOL.BAT.Quantity (mg)>

20

> <UDM.MOL.BAT.Purity (%)>

95

> <UDM.MOL.BAT.ee (%)>

0

> <UDM.MOL.BAT.Formulation>

> <UDM.MOL.BAT.SLT.Name>

none

> <UDM.MOL.BAT.SLT.Count>

0

> <UDM.MOL.BAT.Color>

white

> <UDM.MOL.BAT.State>

powder

> <UDM.MOL.BAT.SAM.Num>

1

> <UDM.MOL.BAT.SAM.Name>

IDYA-7-3-1

> <UDM.MOL.BAT.SAM.ID>

UBC-1a

UBC-1b

> <UDM.MOL.BAT.SAM.Type>

dram1

dram4

> <UDM.MOL.BAT.SAM.Location>

IDYA-Location-1

SHE-Location-1

> <UDM.MOL.BAT.SAM.Form>

neat

neat

> <UDM.MOL.BAT.SAM.Amount (mg)>

10

10

> <UDM.MOL.BAT.SAM.Conc (uM)>

$$$$

# Appendix D: BioChemUDM for Assays

The conditional fields with controlled vocabulary (in tables) and result types (as bullets) for assays are shown below.

| **Protocol: Activation** | | | |
| --- | --- | --- | --- |
| **Assay Name** | **UDM.ASY.CND.Format** | **UDM.ASY.CND.Target** | **UDM.ASY.CND.Conc (uM)** |
| AhR Activation | Std | AhR | 10 |
| PXR Activation | Std | PXR | 30 |

- UDM.ASY.RES.Emax (%)
- UDM.ASY.RES.FoldActive
- UDM.ASY.RES.EC50 (uM)

| **Protocol: Binding** | | | | |
| --- | --- | --- | --- | --- |
| **Assay Name** | **UDM.ASY.CND.Format** | **UDM.ASY.CND.Target** | **UDM.ASY.CND.Species** | **UDM.ASY.CND.Time (hr)** |
| Microsomal Binding (FuLM) | EqDialysis, UltraCentrifuge | Microsome | Dog, Human, Monkey, Mouse, Rat |  |
| Plasma Protein Binding (PPB) | EqDialysis, EqDilute10x, UltraCentrifuge | Plasma | Dog, Human, Monkey, Mouse, Rabbit, Rat |  |
| Protein Binding (BTB, CCM, FuHep, PB) | EqDialysis, UltraCentrifuge | Brain, Hepatocyte, Serum | Cow, Dog, Human, Monkey, Mouse, Rat | 0.5, 1, 2, 4, 6, 8, 16, 24 |

- UDM.ASY.RES.Bound (%)
- UDM.ASY.RES.Recovery (%)
- UDM.ASY.RES.Remaining (%)
- UDM.ASY.RES.Free (%)

| **Protocol: Induction** | | | | |
| --- | --- | --- | --- | --- |
| **Assay Name** | **UDM.ASY.CND.Format** | **UDM.ASY.CND.Target** | **UDM.ASY.CND.Species** | **UDM.ASY.CND.Conc (uM)** |
| CYP Induction | Hepatocyte | CYP3A4 | Human | 1, 3, 5, 10, 30, 100 |

- UDM.ASY.RES.Emax (%)
- UDM.ASY.RES.FoldInduct

| **Protocol: Inhibition** | | | | | |
| --- | --- | --- | --- | --- | --- |
| **Assay Name** | **UDM.ASY.CND.Format** | **UDM.ASY.CND.Target** | **UDM.ASY.CND.Species** | **UDM.ASY.CND.Conc (uM)** | **UDM.ASY.CND.Time (hr)** |
| Inhibition (various kinds) | (s)-Mephenytoin, Bilirubin, Bufuralol, Bupropion, Chlorzoxazone, Cholyltaurine, Coumarin, Dextromethorphan, Dichlorofluorescein, Diclofenac, Digoxin, Estradiol, Midazolam, Paclitaxel, Phenacetin, Std, Testosterone, Tolbutamide | BSEP, CYP1A2, CYP2A6, CYP2B6, CYP2C19, CYP2C8, CYP2C9, CYP2C9-TDI, CYP2C9+NADPH, CYP2D6, CYP2D6-TDI, CYP2D6+NADPH, CYP2E1, CYP3A4, CYP3A4-TDI, CYP3A4+NADPH, MDR1, MRP2, MRP3, MRP4, OATP1B1, OATP1B3, UGT1A1 | Dog, Human | 0.3, 1, 3, 5, 10, 30, 100 | 0.5 |

- UDM.ASY.RES.IC50 (uM)
- UDM.ASY.RES.Percent (%)

| **Protocol: Oxidation** | | | | |
| --- | --- | --- | --- | --- |
| **Assay Name** | **UDM.ASY.CND.Format** | **UDM.ASY.CND.Target** | **UDM.ASY.CND.Species** | **UDM.ASY.CND.Conc (uM)** |
| AO, XO | Allopurinol, Raloxifen, Std | Aldehyde, Xanthine | Human, Mouse, Rat | 10, 50 |

- UDM.ASY.RES.Extraction (%)
- UDM.ASY.RES.Clearance (L/h/kg)
- UDM.ASY.RES.Remaining (%)

| **Protocol: Permeability** | | | | |
| --- | --- | --- | --- | --- |
| **Assay Name** | **UDM.ASY.CND.Format** | **UDM.ASY.CND.Target** | **UDM.ASY.CND.Species** | **UDM.ASY.CND.Conc (uM)** |
| Caco-2, MDCK, MDR1 | Elacridar, PSC833, Tariquidar, Verapamil | BCRP, MDR1, MDR2, MDR3, MDR4, MDR5, MDR6, MDR7, WT | Dog, Human | 5, 10, 100 |

- UDM.ASY.RES.Efflux (Ratio)
- UDM.ASY.RES.PappA-B (10-6 cm/s)
- UDM.ASY.RES.PappB-A (10-6 cm/s)
- UDM.ASY.RES.RecoveryAP-BL (%)
- UDM.ASY.RES.RecoveryBL-AP (%)

| **Protocol: Pharmacokinetics** | | | | | | | | |
| --- | --- | --- | --- | --- | --- | --- | --- | --- |
| **Assay Name** | **UDM.ASY.CND.Species** | **UDM.ASY.CND.Strain** | **UDM.ASY.CND.Gender** | **UDM.ASY.CND.Disease** | **UDM.ASY.CND.Matrix** | **UDM.ASY.CND.Route** | **UDM.ASY.CND.Dose (mg/kg)** | **UDM.ASY.CND.Vehicle** |
| PK | Dog, Monkey, Mouse, Rat | BALB/c, Beagle, CD1, Cyno, Sprague-Dawley, Wistar Han | Female, Male | Naive, Tumor | Bile, Blood, Brain, CSF, Feces, Plasma, Tumor, Urine | IP, IV, PO, SC | 0.25, 0.5, 1, 3, 5, 10, 30, 60, 100, 150, 300, 400, 500, 600, 1000 | Capsule, Dispersion, Methylcellulose, Saline, Tablet |

- UDM.ASY.RES.Cmax (ng/mL)
- UDM.ASY.RES.Half-Life (hr)
- UDM.ASY.RES.Tlast (hr)
- UDM.ASY.RES.Tmax (hr)
- UDM.ASY.RES.F (%)
- UDM.ASY.RES.AUClast (ng.h/mL)
- UDM.ASY.RES.AUCinf (ng.h/mL)
- UDM.ASY.RES.Cl (mL/min/kg)
- UDM.ASY.RES.Vd (L/kg)

| **Protocol: PhysChemProperty** | | | | | |
| --- | --- | --- | --- | --- | --- |
| **Assay Name** | **UDM.ASY.CND.Format** | **UDM.ASY.CND.Target** | **UDM.ASY.CND.Species** | **UDM.ASY.CND.Conc (uM)** | **UDM.ASY.CND.Time (hr)** |
| Blood Partition, LogD, LogP, pKa, Solubility (kinetic, thermodynamic) | KineticSol, LogD, LogP, Percent, pKa, pKa2, pKa3, Red, ThermoSol, Whole | Blood, CYP (uM), FaSSIF (uM), FeSSIF (uM), hERG (uM), pH2 (uM), pH4 (uM), pH6 (uM), pH7 (uM), pH8 (uM), pKa, SGF | Dog, Human, Monkey, Mouse, Rat | 5, 300 | 0, 1, 2, 4, 24, 48, 72, 96 |

- UDM.ASY.RES.Value

| **Protocol: Stability** | | | | | | |
| --- | --- | --- | --- | --- | --- | --- |
| **Assay Name** | **UDM.ASY.CND.Format** | **UDM.ASY.CND.Target** | **UDM.ASY.CND.Species** | **UDM.ASY.CND.Gender** | **UDM.ASY.CND.Conc (uM)** | **UDM.ASY.CND.Time (hr)** |
| Stability (CS, GSH, GS, Hep. LM) | Centrifuge, Enzyme, EqDialysis, EqDilute10x, Fluid, Glutathione, Inactive, NADPH, NADPH+UDPGA, Saline, UltraCentrifuge | Blood, CYP1A1+NADPH, FaSSIF, FeSSIF, Hepatocyte, IS9, MAO-A, MAO-B, Microsome, PexSGF, pH2, pH7, pH8, Plasma, Saline, Serum, SGF, SIF | Cow, Dog, Human, Monkey, Mouse, Rat | Female, Male | 0.5, 1, 5 | 0.25, 0.5, 1, 1.5, 2, 3, 4, 6, 20, 24, 48,72,96, 144, 192 |

- UDM.ASY.RES.Extraction (%)
- UDM.ASY.RES.Half-Life (min)
- UDM.ASY.RES.Intrinsic Clearance (uL/min/mg protein)
- UDM.ASY.RES.Scaled Clearance (mL/min/kg)
- UDM.ASY.RES.Clearance (L/h/kg)
- UDM.ASY.RES.Clearance (uL/min/pmol)
- UDM.ASY.RES.Baseline (%)
- UDM.ASY.RES.Remaining (%)

| **Protocol: Toxicity** | | | |
| --- | --- | --- | --- |
| **Assay Name** | **UDM.ASY.CND.Format** | **UDM.ASY.CND.Target** | **UDM.ASY.CND.Conc (uM)** |
| Tox-hERG | hERG | HEK293 | 10, 30 |

- UDM.ASY.RES. IC50 (uM)
